# Supplementary material for: NR5A1/SF-1 Collaborates with Inhibin α and the Androgen Receptor to Reveal a Complex DSD Phenotype
Source: Preprints.org preprint supplement (doi:10.20944/preprints202408.0883.v1), 2024-08-14
Supplement: Supplementary file 1 [file supplementary]

***Supplementary Materials***


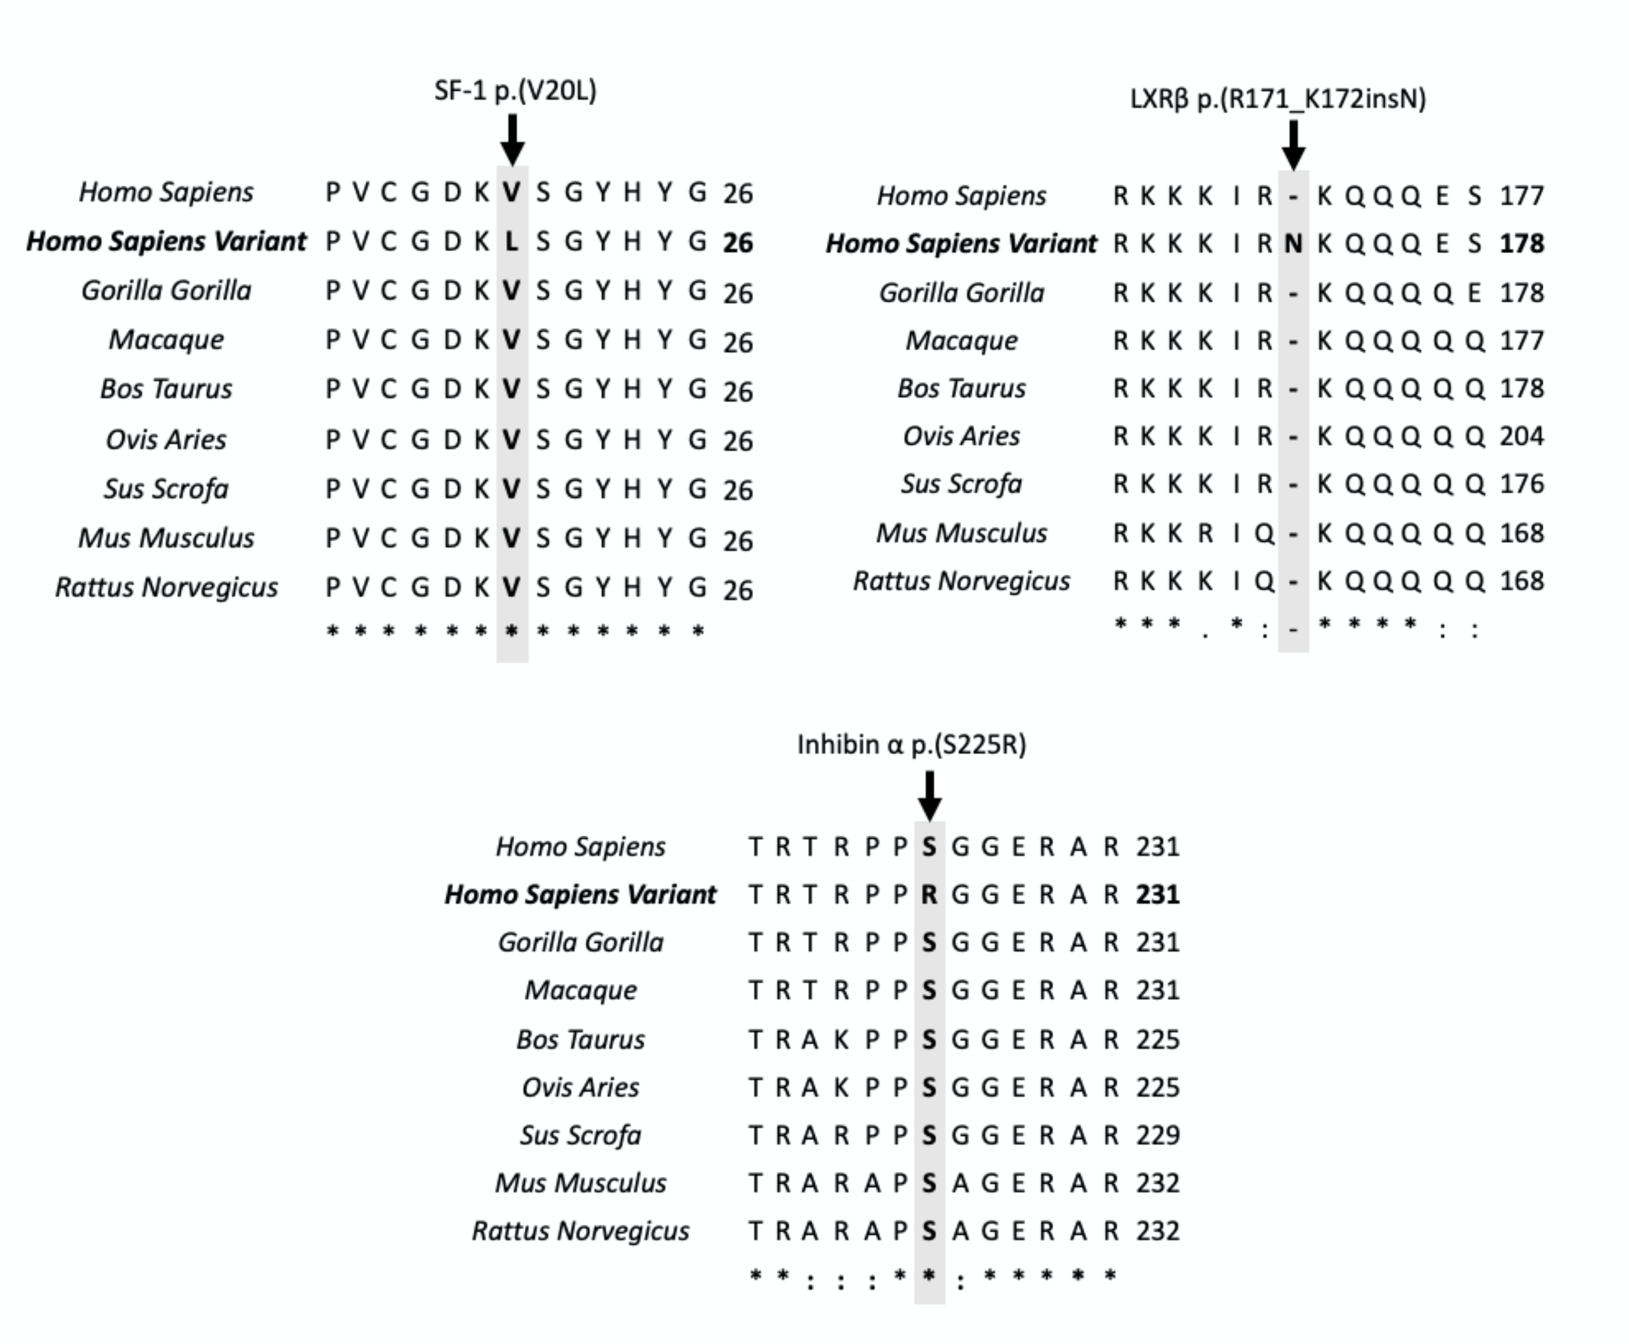


**Figure S1:** Protein localization and conservation across species of the three variants *NR5A1*/SF-1 p.(V20L), *NR1H2*/LXRβ p.(R171_K172insN) and *INHA*/inhibin α p.(S225R). The alignment of the various proteins across different species is shown. Localization of the identified human amino acid variants is indicated with arrows and seems highly conserved across species.

**Table S1: Reported combined variants in NR5A1 and associated genes**

The DSD phenotype, NR5A1 and NR5A1-associated gene variants, zygosity and the genetic test used for the variants identification are presented.

| **Patient phenotype*** | ***NR5A1*/SF-1**  **variant**  (NM_004959.5) | **Genetic test** | **Name of the additional gene variant/ (transcript)** | **Gene variant** | **References** |
| --- | --- | --- | --- | --- | --- |
| 46,XY DSD | c.1256T>A1;  p.(L419Q) | Panel | *AR*  (NM_000044.6) | c.2659A>G2;  p.(M887V) | [[1](#_ENREF_1)] |
| 46,XY DSD  Hypospadias | c.251G>A1 ; p.(R84H) | Panel | *ZFPM2*  (NM_012082.4) | c.2107A>C1;  p.(M703L) | [[1](#_ENREF_1)] |
| 46,XY DSD  CGD | c.630-636del1; p.(Y211Tfs*83) | WES | *TBX2*  (NM_005994.4) | c.641A>G1;  p.(N214S) | [[2](#_ENREF_2)] |
| 46,XY  GD | c.937C>T1; p.(R313C) | Panel | *MAP3K1* (NM_005921.2) | c.710A>G1;  p.(Q237R) | [[3](#_ENREF_3), [4](#_ENREF_4)] |
| 46,XY DSD Micropenis, hypospadias | c.104G>T1; p.(G35V) | Panel | *BMP2*  (NM_001200.4) | c.316G>A1;  p.(A106T) | [[4](#_ENREF_4), [5](#_ENREF_5)] |
| 46,XY DSD  Vulvar dysplasia, no inguinal gonad | c.634G>A1; p.(G212S) | Panel | *SRY*  (NM_003140.3) | c.227G>T2;  p.(R76L) | [[5](#_ENREF_5)] |
| *FGF10*  (NM_004465.2) | c.610A>G1;  p.(M204V) | [[5](#_ENREF_5)] |
| 46,XY DSD Micropenis, hypospadias, cryptorchidism | c.86C>A1;  p.(T29K) | Panel | *AR*  (NM_000044.6) | c.884T>C1;  p.(L295P) | [[5](#_ENREF_5)] |
| *MYH6*  (NM_002471.4) | c.4231G>A2;  p.(A1411T) | [[5](#_ENREF_5)] |
| 46,XY DSD, Micropenis, hypospadias, unilateral cryptorchidism | c.1109G>A1 ; p.(C370Y) | Panel | *SOX3*  (NM_005634.3) | c.157G>C1;  p.(V53L) | [[5](#_ENREF_5)] |
| 46,XY DSD Micropenis, hypospadias, cryptorchidism, gonadal dysplasia | c.1289G>T1; p.(S430I) | Panel | *HSD17B3* (NM_000197.2) | c.179T>C1;  p.(I60T) | [[5](#_ENREF_5)] |
| *WT1*  (NM_001198551.2) | c.19A>C1;  p.(T7P) | [[5](#_ENREF_5)] |
| 46,XY DSD Micropenis, hypospadias, cryptorchidism | c.849C>A1; p.(C283*) | Panel | *CST9*  (NM_001008693.3) | c.259C>T1;  p.(R87*) | [[5](#_ENREF_5)] |
| 46,XY DSD, Micropenis, hypospadias, unilateral cryptorchidism | c.1100A>G1; p.(E367G) | Panel | *CST9*  (NM_001008693.3) | c.259C>T1;  p.(R87*) | [[5](#_ENREF_5)] |
| 46,XY DSD Micropenis, hypospadias | c.265del1; p.(R89fs*105) | Panel | *EGF*  (NM_001178131.3) | c.2995G>A1;  p.(V999M) | [[5](#_ENREF_5)] |
| 46,XY DSD | c.1171A>T1; p.(K391*) | Panel | *ATRX*  (NM_000489.6) | c.2595C>G1;  p.(H865Q) | [[6](#_ENREF_6)] |
| *AMH*  (NM_000479.5) | c.-2C>T1 | [[6](#_ENREF_6)] |
| 46,XY DSD GD | c.251G>A1; p.(R84H) | Panel | *ZFPM2*  (NM_012082.4) | c.2107A>C1;  p.(M703L) | [[7](#_ENREF_7), [8](#_ENREF_8)] |
| 46,XY DSD Hypospadias | c.1114_1116del1 ; p.(K372del) | Panel | *SRD5A2*  (NM_000348.4) | c.680G>A1;  p.(R227Q) | [[7](#_ENREF_7), [9](#_ENREF_9)] |
| 46,XY DSD, Ambiguous genitalia | c.70C>T1;  p.(H24Y) | WES | *AKR1C3*  (NM_003739.6) | c.548A>G1;  p.(L183R) | [[10](#_ENREF_10)] |
| *DOCK8*  (NM_203447.4) | c.1139T>C1;  p.(l380T) | [[10](#_ENREF_10)] |
| *FSHR*  (NM_000145.4) | c.1532A>G1;  p.(Y511C) | [[10](#_ENREF_10)] |
| *NCOR1*  (NM_006311.3) | c.6754C>T1;  p.(H2252Y)& c.6544G>A1;  p.(A2182T) | [[10](#_ENREF_10)] |
| *POR*  (NM_001382662.3) | c.1264T>G1;  p.(W422G) | [[10](#_ENREF_10)] |
| 46,XY DSD Bilateral inguinal hernia | c.70delC1; p.(H24Tfs*51) | WES | *CACNG4*  (NM_014405.4) | c.715C>T1;  p.(R239W) | [[10](#_ENREF_10), [11](#_ENREF_11)] |
| *FBLN2*  (NM_001004019.2) | c.385G>A1;  p.(D129N) | [[10](#_ENREF_10)] |
| *NAV1*  (NM_020443.5) | c.2947C>A1;  p.(P983T) | [[10](#_ENREF_10)] |
| *SMAD6*  (NM_005585.5) | c.1455dupC1; p.(C486Lfs*79) | [[10](#_ENREF_10)] |
| *SRA1*  (NM_001035235.3) | c.94C>G1;  p.(Q32E) | [[10](#_ENREF_10)] |
| *ZDHHC11*  (NM_024786.3) | c.676G>A1;  p.(V226M) | [[10](#_ENREF_10)] |
| *ZFPM2*  (NM_012082.4) | c.302G>A1;  p.(G101E) | [[10](#_ENREF_10)] |
| 46,XY DSD  Female external genitalia | c.614_615insC1; p.(Q206Tfs*20) | WES | *CHD7*  (NM_017780.4) | c.7579A>C1;  p.(M2527L) | [[10](#_ENREF_10), [11](#_ENREF_11)] |
| *DENND1A*  (NM_020946.2) | c.2351C>A1;  p.(A784D) | [[10](#_ENREF_10)] |
| *GDNF*  (NM_001190468.1) | c.328C>T1;  p.(R110W) | [[10](#_ENREF_10)] |
| *GLI2*  (NM_001371271.1) | c.4333C>T1;  p.(L1445F) | [[10](#_ENREF_10)] |
| *SOX30*  (NM_178424.2) | c.455C>T1;  p.(Pro152Leu) | [[10](#_ENREF_10)] |
| 46,XY DSD Hypospadias, cryptorchidism | c.58G>C1;  p.(V20L) | WES | *INHA*  (NM_002191.4) | c.675T>G1;  p.(S225R) | [[10](#_ENREF_10), [11](#_ENREF_11)] |
| 46,XY DSD | c.88T>A1;  p.(C30S) | WES | *STAR*  (NM_000349.3) | c.361C>T1;  p.(R121W) | [[12](#_ENREF_12)] |
| 46,XY DSD | c.614_615insC1; p.(Q206Tfs*20) | WES | *AMH*  (NM_000479.5) | c.428C>T1;  p.(T143l) | [[11](#_ENREF_11), [12](#_ENREF_12)] |
| 46,XY DSD | c.1183_1185delGAG1; p.(E395del) | WES | *ZFPM2*  (NM_012082.4) | c.1632G>A1;  p.(M544l) | [[12](#_ENREF_12), [13](#_ENREF_13)] |
| 46,XY DSD  PGD | c.288_304del1;  p.(M98Gfs*45) | WES | *DHX37*  (NM_032656.4) | c.1399C>G1; p.(L467V) | [[14](#_ENREF_14)] |
| 46,XY DSD PGD | c.11C>A1;  p.(S4*) | WES | *DHX37*  (NM_032656.4) | c.2995G>A1; p.(V999M) | [[14](#_ENREF_14)] |
| 46,XY DSD (CAIS) | Deletion of exon 7. (~32 kb affecting  chr9:127213317-127245328)1. | CNV  Analysis  CNV  analysis | *AR*  *FSHR* | Duplication of exon 2 of the X-linked *AR* gene  Deletion  of exons 2–10. (~105 kb region affecting chr2:49189845-49295452)3 | [[15](#_ENREF_15)]  [[15](#_ENREF_15)] |
| 46,XY DSD Micropenis | c.-762C>T1 | WES | *SRA1*  (NM_001035235.4) | c.478C>T1; p.(R160W) | [[16](#_ENREF_16)] |
| 46,XY PGD | c.-413G>A1 and  c.-207C>A1 | WES | *WDR11*  (NM_018117.12)  *WWOX*  (NM_016373.4) | c.3033_3036del1; p.(D1011Efs*21)  c.1088C>A1; p.(A363D) | [[16](#_ENREF_16)]  [[16](#_ENREF_16)] |
| 46,XY DSD  Ambiguous genitalia, GD | c.937C>T1;  p.(R313C) | WES | *MAP3K1*  (NM_005921.2) | c.710A>G1;  p.(E237R) | [[17](#_ENREF_17)] |
| 46,XY DSD  Hypospadias | c.929A>C1; p.(H310P) | WES | *MAP3K1*  (NM_005921.2) | c.2282T>C1;  p. (I761T) | [[18](#_ENREF_18)] |
|  |  |  |  |  |  |
| 46,XY DSD  Hypospadias | c.991-1G>C1;  p.(G330_S331del) | WES | *OTX2*  (NM_021728.4) | c.425C>G1;  p.(P134R)/p.(P142R) | [[19](#_ENREF_19)] |
| 46,XDY DSD  Hypospadias | c.991-1G>C1;  p.(G330_S331del) | WES | *PROP1*  (NM_006261.5) | c.301_302delAG1;  p.(L102CfsTer8) | [[19](#_ENREF_19)] |
| 46,XY Mild DSD | c.437G>C1;  p.(G146A) | WES | *FGFR3*  (NM_000142.5) | c.1633_1634del1; p.(C545Hfs*17) | [[20](#_ENREF_20)] |
|  |  |  | *ADAMTS16* (NM_139056.4)  *INSR*  (NM_000208.4) | c.1822_1823del1;  p.(H608*)  c.660_661del1; p.(P220Hfs*4) | [[20](#_ENREF_20)]  [[20](#_ENREF_20)] |
| 46,XY Severe DSD | c.437G>C1;  p.(G146A) | WES | *GLI2*  (NM_001371271.1) | c.3528G>T1; p.(Q1176H) | [[20](#_ENREF_20)] |
|  |  |  | *CHD7*  (NM_017780.4)  *MYO7A*  (NM_000260.4)  *VDR*  (NM_000376.3) | c.1623C>A1;  p.(H541Q)  c.2882G>A1;  p.(G961A)  c.176C>T1;  p.(T59I) | [[20](#_ENREF_20)]  [[20](#_ENREF_20)]  [[20](#_ENREF_20)] |
| 46,XY Mild DSD | c.437G>C1;  p.(G146A) | WES | *NRP1*  (NM_003873.7) | c.182C>A1;  p.(P61Q) | [[20](#_ENREF_20)] |
| 46,XY Opposite sex DSD | c.437G>C1;  p.(G146A) | WES | *LHCGR*  (NM_000233.4) | c.757T>C3;  p.(S253P) | [[20](#_ENREF_20)] |
| 46,XX Opposite sex DSD | c.437G>C3;  p.(G146A) | WES | *COL27A1*  (NM_032888.4)  *TYRO3*  (NM_006293.4) | c.3715C>T1; p.(R1239W)  c.666_667insCACTGCCTGCAGCCCCCTTCAACATCACC1;  p.(A223Hfs*21) | [[20](#_ENREF_20)]  [[20](#_ENREF_20)] |
| 46,XY Mild DSD | c.437G>C1;  p.(G146A) | WES | *SOX8*  (NM_014587.5) | c.676A>C1;  p.(T226P) | [[20](#_ENREF_20)] |
| 46,XY Severe DSD | c.437G>C1;  p.(G146A) | WES | *POR*  (NM_001395413.1)  *PKD1*  (NM_001009944.3)  *SRCAP*  (NM_006662.3)  *SOX9*  (NM_000346.4) | c.1679C>T1;  p.(T560M)  c.2624C>T1;  p.(P875L)  c.7142G>A1; p.(R2381H)  c.710dup1; p.(P238Tfs*14) | [[20](#_ENREF_20)]  [[20](#_ENREF_20)]  [[20](#_ENREF_20)]  [[20](#_ENREF_20)] |
| 46,XY Opposite sex DSD | c.437G>C1;  p.(G146A) | WES | *AR*  (NM_000044.6) | c.2323C>T2;  p.(R775C) | [[20](#_ENREF_20)] |
|  |  |  |  |  |  |
| 46,XY Idiopathic oligozoospermia | c.1063G>A1;  p.(V355M) | Panel | *USP9Y* (NM_004654.4) | c.3178G>A2;  p.(A1060T) | [[21](#_ENREF_21)] |
| 46,XX BPES and POI | c.578T>A1;  p.(I193N) | Sanger  sequencing | *LHX4*  (NM_033343.4) | c.250C>T1;  p.(R84C) | [[22](#_ENREF_22)] |
|  |  |  |  |  |  |
| 46,XX DSD | c.486C>Tn/a;  p.(=) | Panel | *LHCGR*  (NM_000233.4) | c.458+3A>Gn/a | [[6](#_ENREF_6)] |
|  |  |  |  |  |  |
| 46,XY DSD | c.77C>T1;  p.(G26V) | Panel | *DHX37* (NM_032656.4) | c.1474G>C1;  p.(A494P) | [[23](#_ENREF_23)] |
| 46,XX POI | c.1233C>T1;  p.(H410=) | Panel | *FSHR* (NM_000145.4) | c.1664C>T1;  p.(T555I) | [[24](#_ENREF_24)] |
| 46,XY DSD | c.634G>An/a;  p.(G212S) | Sanger sequencing | *SRY* (NM_003140.3) | c.227G>Tn/a;  p.(R76L) | [[25](#_ENREF_25)] |
|  |  |  | *FGF10* (NM_004465.2) | c.610A>Gn/a;  p.(M204V) | [[25](#_ENREF_25)] |
| 46,XY DSD  Micropenis | c.1223A>C1;  p.(H408P) | WES | *MAP3K1*  (NM_005921.2)  *CTU2*  (NM_001012759.3) | c.3418A>G1;  p.(M1140V)  c.710C>T1;  p.(A237V) | [[26](#_ENREF_26)]  [[26](#_ENREF_26)] |
| 47,XXY Opposite sex DSD | c.50G>T1;  p.(G17V) | WES | *AMH*  (NM_000479.5) | c.300C>T1;  p.(F100=) | [[27](#_ENREF_27)] |
| 47,XY Severe DSD | c.218G>C1;  p.(C73S) | WES | *SRD5A2*  (NM_000348.4) | c.265C>G3;  p.(L89V) | [[27](#_ENREF_27)] |
| 47,XY Severe DSD | c.219C>G1;  p.(C73W) | WES | *SZT2*  (NM_015284.4)  *ALMS1*  (NM_015120.4)  *BTD*  (NM_000060.4)  *TREX1*  (NM_033629.6)  *PDHB*  (NM_000925.4)  *VCAN*  (NM_004385.5)  *SYNE1*  (NM_033071.5)  *ARID1B* (NM_020732.3)  *RELN* (NM_005045.4)  *ARMC4*  (NM_018076.5)  *DYNC2H1*  (NM_001377.3)  *HEPACAM* (NM_152722.5)  *GALC*  (NM_000153.4)  *OCA2*  (NM_000275.3)  *GAA* (NM_000152.5)  *SIK1* (NM_173354.5) | c.4039C>T1;  p.(R1347C)  c.4207A>G1;  p.(T403A)  c.1330G>C1;  p.(D444H)  c.206T>C1;  p.(L69P)  c.701-3C>T1  c.1412C>T1;  p.(T471M)  c.14732G>A1; p.(R4911H)  c.369_392dup1; p.(Q124_Q131dup)  c.865A>G1;  p.(N289D)  c.1386+5G>A1  c.4295T>C1;  p.(I1432T)  c.139G>A1;  p.(V47M)  c.1685T>C1;  p.(I562T)  c.1025A>G1;  p.(Y342C)  c.2065G>A1;  p.(E689K)  c.1784G>A1;  p.(R595Q) | [[27](#_ENREF_27)]  [[27](#_ENREF_27)]  [[27](#_ENREF_27)]  [[27](#_ENREF_27)]  [[27](#_ENREF_27)]  [[27](#_ENREF_27)]  [[27](#_ENREF_27)]  [[27](#_ENREF_27)]  [[27](#_ENREF_27)]  [[27](#_ENREF_27)]  [[27](#_ENREF_27)]  [[27](#_ENREF_27)]  [[27](#_ENREF_27)]  [[27](#_ENREF_27)]  [[27](#_ENREF_27)]  [[27](#_ENREF_27)] |
| 46,XY Opposite sex DSD | c.680T>C1;  p.(I227T) | WES | *POR*  (NM_000941.3) | c.859G>C1;  p.(A287P) | [[27](#_ENREF_27)] |

DSD, disorders/differences of sex development; CGD, complete gonadal dysgenesis; WES, whole-exome sequencing; GD,gonadal dysgenesis; PGD, primary gonadal dysgenesis; CAIS, complete androgen insensitivity; CNV, Copy number variations; BPES: blepharoptosis–ptosis–epicanthus syndrome; POI: primary ovarian insufficiency.1 Heterozygous variant 2 Hemizygous variant; 3 Homozygous variant; n/a: not available. *The clinical phenotype is indicated when available and according to the description in the corresponding publication.

# **References**

1. Eggers, S.; Sadedin, S.; van den Bergen, J. A.; Robevska, G.; Ohnesorg, T.; Hewitt, J.; Lambeth, L.; Bouty, A.; Knarston, I. M.; Tan, T. Y.; Cameron, F.; Werther, G.; Hutson, J.; O'Connell, M.; Grover, S. R.; Heloury, Y.; Zacharin, M.; Bergman, P.; Kimber, C.; Brown, J.; Webb, N.; Hunter, M. F.; Srinivasan, S.; Titmuss, A.; Verge, C. F.; Mowat, D.; Smith, G.; Smith, J.; Ewans, L.; Shalhoub, C.; Crock, P.; Cowell, C.; Leong, G. M.; Ono, M.; Lafferty, A. R.; Huynh, T.; Visser, U.; Choong, C. S.; McKenzie, F.; Pachter, N.; Thompson, E. M.; Couper, J.; Baxendale, A.; Gecz, J.; Wheeler, B. J.; Jefferies, C.; MacKenzie, K.; Hofman, P.; Carter, P.; King, R. I.; Krausz, C.; van Ravenswaaij-Arts, C. M.; Looijenga, L.; Drop, S.; Riedl, S.; Cools, M.; Dawson, A.; Juniarto, A. Z.; Khadilkar, V.; Khadilkar, A.; Bhatia, V.; Dũng, V. C.; Atta, I.; Raza, J.; Thi Diem Chi, N.; Hao, T. K.; Harley, V.; Koopman, P.; Warne, G.; Faradz, S.; Oshlack, A.; Ayers, K. L.; Sinclair, A. H., Disorders of sex development: insights from targeted gene sequencing of a large international patient cohort. *Genome Biol* **2016,** 17, (1), 243.

2. Werner, R.; Mönig, I.; Lünstedt, R.; Wünsch, L.; Thorns, C.; Reiz, B.; Krause, A.; Schwab, K. O.; Binder, G.; Holterhus, P.-M.; Hiort, O., New NR5A1 mutations and phenotypic variations of gonadal dysgenesis. *PLoS One* **2017,** 12, (5), e0176720-e0176720.

3. Mazen, I.; Abdel-Hamid, M.; Mekkawy, M.; Bignon-Topalovic, J.; Boudjenah, R.; El Gammal, M.; Essawi, M.; Bashamboo, A.; McElreavey, K., Identification of NR5A1 Mutations and Possible Digenic Inheritance in 46,XY Gonadal Dysgenesis. *Sex Dev* **2016,** 10, (3), 147-51.

4. Allali, S.; Muller, J.-B.; Brauner, R.; Lourenço, D.; Boudjenah, R.; Karageorgou, V.; Trivin, C.; Lottmann, H.; Lortat-Jacob, S.; Nihoul-Fékété, C.; De Dreuzy, O.; McElreavey, K.; Bashamboo, A., Mutation Analysis of NR5A1 Encoding Steroidogenic Factor 1 in 77 Patients with 46, XY Disorders of Sex Development (DSD) Including Hypospadias. *PLoS One* **2011,** 6, (10), e24117.

5. Wang, H.; Zhang, L.; Wang, N.; Zhu, H.; Han, B.; Sun, F.; Yao, H.; Zhang, Q.; Zhu, W.; Cheng, T.; Cheng, K.; Liu, Y.; Zhao, S.; Song, H.; Qiao, J., Next-generation sequencing reveals genetic landscape in 46, XY disorders of sexual development patients with variable phenotypes. *Human Genetics* **2018,** 137, (3), 265-277.

6. Hughes, L. A.; McKay-Bounford, K.; Webb, E. A.; Dasani, P.; Clokie, S.; Chandran, H.; McCarthy, L.; Mohamed, Z.; Kirk, J. M. W.; Krone, N. P.; Allen, S.; Cole, T. R. P., Next generation sequencing (NGS) to improve the diagnosis and management of patients with disorders of sex development (DSD). *Endocr Connect* **2019,** 8, (2), 100-110.

7. Robevska, G.; van den Bergen, J. A.; Ohnesorg, T.; Eggers, S.; Hanna, C.; Hersmus, R.; Thompson, E. M.; Baxendale, A.; Verge, C. F.; Lafferty, A. R.; Marzuki, N. S.; Santosa, A.; Listyasari, N. A.; Riedl, S.; Warne, G.; Looijenga, L.; Faradz, S.; Ayers, K. L.; Sinclair, A. H., Functional characterization of novel NR5A1 variants reveals multiple complex roles in disorders of sex development. *Hum Mutat* **2018,** 39, (1), 124-139.

8. Köhler, B.; Lin, L.; Ferraz-de-Souza, B.; Wieacker, P.; Heidemann, P.; Schröder, V.; Biebermann, H.; Schnabel, D.; Grüters, A.; Achermann, J. C., Five novel mutations in steroidogenic factor 1 (SF1, NR5A1) in 46,XY patients with severe underandrogenization but without adrenal insufficiency. *Hum Mutat* **2008,** 29, (1), 59-64.

9. Eggers, S.; Smith, K. R.; Bahlo, M.; Looijenga, L. H. J.; Drop, S. L. S.; Juniarto, Z. A.; Harley, V. R.; Koopman, P.; Faradz, S. M. H.; Sinclair, A. H., Whole exome sequencing combined with linkage analysis identifies a novel 3 bp deletion in NR5A1. *Eur J Hum Genet* **2015,** 23, (4), 486-493.

10. Camats, N.; Fernández-Cancio, M.; Audí, L.; Schaller, A.; Flück, C. E., Broad phenotypes in heterozygous NR5A1 46,XY patients with a disorder of sex development: an oligogenic origin? *Eur J Hum Genet* **2018,** 26, (9), 1329-1338.

11. Camats, N.; Pandey, A. V.; Fernandez-Cancio, M.; Andaluz, P.; Janner, M.; Toran, N.; Moreno, F.; Bereket, A.; Akcay, T.; Garcia-Garcia, E.; Munoz, M. T.; Gracia, R.; Nistal, M.; Castano, L.; Mullis, P. E.; Carrascosa, A.; Audi, L.; Fluck, C. E., Ten novel mutations in the NR5A1 gene cause disordered sex development in 46,XY and ovarian insufficiency in 46,XX individuals. *J Clin Endocrinol Metab* **2012,** 97, (7), E1294-306.

12. Martinez de LaPiscina, I.; Mahmoud, R. A.; Sauter, K. S.; Esteva, I.; Alonso, M.; Costa, I.; Rial-Rodriguez, J. M.; Rodriguez-Estevez, A.; Vela, A.; Castano, L.; Fluck, C. E., Variants of STAR, AMH and ZFPM2/FOG2 May Contribute towards the Broad Phenotype Observed in 46,XY DSD Patients with Heterozygous Variants of NR5A1. *Int J Mol Sci* **2020,** 21, (22).

13. Bashamboo, A.; Brauner, R.; Bignon-Topalovic, J.; Lortat-Jacob, S.; Karageorgou, V.; Lourenco, D.; Guffanti, A.; McElreavey, K., Mutations in the FOG2/ZFPM2 gene are associated with anomalies of human testis determination. *Hum Mol Genet* **2014,** 23, (14), 3657-65.

14. de Oliveira, F. R.; Mazzola, T. N.; de Mello, M. P.; Francese-Santos, A. P.; Lemos-Marini, S. H. V.; Maciel-Guerra, A. T.; Hiort, O.; Werner, R.; Guerra-Junior, G.; Fabbri-Scallet, H., DHX37 and NR5A1 Variants Identified in Patients with 46,XY Partial Gonadal Dysgenesis. *Life (Basel)* **2023,** 13, (5).

15. Sreenivasan, R.; Bell, K.; van den Bergen, J.; Robevska, G.; Belluoccio, D.; Dahiya, R.; Leong, G. M.; Dulon, J.; Touraine, P.; Tucker, E. J.; Ayers, K.; Sinclair, A., Whole exome sequencing reveals copy number variants in individuals with disorders of sex development. *Mol Cell Endocrinol* **2022,** 546, 111570.

16. Fabbri-Scallet, H.; Werner, R.; Guaragna, M. S.; de Andrade, J. G. R.; Maciel-Guerra, A. T.; Hornig, N. C.; Hiort, O.; Guerra-Junior, G.; de Mello, M. P., Can Non-Coding NR5A1 Gene Variants Explain Phenotypes of Disorders of Sex Development? *Sex Dev* **2022,** 16, (4), 252-260.

17. Mazen, I.; Mekkawy, M.; Kamel, A.; Essawi, M.; Hassan, H.; Abdel-Hamid, M.; Amr, K.; Soliman, H.; El-Ruby, M.; Torky, A.; El Gammal, M.; Elaidy, A.; Bashamboo, A.; McElreavey, K., Advances in genomic diagnosis of a large cohort of Egyptian patients with disorders of sex development. *Am J Med Genet A* **2021,** 185, (6), 1666-1677.

18. Cheng, Y.; Chen, J.; Zhou, X.; Yang, J.; Ji, Y.; Xu, C., Characteristics and possible mechanisms of 46, XY differences in sex development caused by novel compound variants in NR5A1 and MAP3K1. *Orphanet J Rare Dis* **2021,** 16, (1), 268.

19. Laan, M.; Kasak, L.; Timinskas, K.; Grigorova, M.; Venclovas, C.; Renaux, A.; Lenaerts, T.; Punab, M., NR5A1 c.991-1G > C splice-site variant causes familial 46,XY partial gonadal dysgenesis with incomplete penetrance. *Clin Endocrinol (Oxf)* **2021,** 94, (4), 656-666.

20. Martinez de Lapiscina, I.; Kouri, C.; Aurrekoetxea, J.; Sanchez, M.; Naamneh Elzenaty, R.; Sauter, K. S.; Camats, N.; Grau, G.; Rica, I.; Rodriguez, A.; Vela, A.; Cortazar, A.; Alonso-Cerezo, M. C.; Bahillo, P.; Bertholt, L.; Esteva, I.; Castano, L.; Fluck, C. E., Genetic reanalysis of patients with a difference of sex development carrying the NR5A1/SF-1 variant p.Gly146Ala has discovered other likely disease-causing variations. *PLoS One* **2023,** 18, (7), e0287515.

21. Cannarella, R.; Condorelli, R. A.; Paolacci, S.; Barbagallo, F.; Guerri, G.; Bertelli, M.; La Vignera, S.; Calogero, A. E., Next-generation sequencing: toward an increase in the diagnostic yield in patients with apparently idiopathic spermatogenic failure. *Asian J Androl* **2021,** 23, (1), 24-29.

22. Giannakopoulos, A.; Sertedaki, A.; Chrysis, D., A human paradigm of LHX4 and NR5A1 developmental gene interaction in the pituitary gland and ovary? *Eur J Hum Genet* **2022,** 30, (10), 1191-1194.

23. Gomes, N. L.; Batista, R. L.; Nishi, M. Y.; Lerario, A. M.; Silva, T. E.; de Moraes Narcizo, A.; Benedetti, A. F. F.; de Assis Funari, M. F.; Faria Junior, J. A.; Moraes, D. R.; Quintao, L. M. L.; Montenegro, L. R.; Ferrari, M. T. M.; Jorge, A. A.; Arnhold, I. J. P.; Costa, E. M. F.; Domenice, S.; Mendonca, B. B., Contribution of Clinical and Genetic Approaches for Diagnosing 209 Index Cases With 46,XY Differences of Sex Development. *J Clin Endocrinol Metab* **2022,** 107, (5), e1797-e1806.

24. Oral, E.; Toksoy, G.; Sofiyeva, N.; Celik, H. G.; Karaman, B.; Basaran, S.; Azami, A.; Uyguner, Z. O., Clinical and Genetic Investigation of Premature Ovarian Insufficiency Cases from Turkey. *J Gynecol Obstet Hum Reprod* **2019,** 48, (10), 817-823.

25. Wang, N.; Zhu, W.; Han, B.; Wang, H.; Zhu, H.; Chen, Y.; Chen, Y.; Liu, J.; Liu, Y.; Zhao, S.; Song, H.; Qiao, J., Inherited Missense Mutation Occurring in Arginine76 of the SRY Gene Does Not Account for Familial 46, XY Sex Reversal. *J Clin Endocrinol Metab* **2020,** 105, (5).

26. Zidoune, H.; Ladjouze, A.; Chellat-Rezgoune, D.; Boukri, A.; Dib, S. A.; Nouri, N.; Tebibel, M.; Sifi, K.; Abadi, N.; Satta, D.; Benelmadani, Y.; Bignon-Topalovic, J.; El-Zaiat-Munsch, M.; Bashamboo, A.; McElreavey, K., Novel Genomic Variants, Atypical Phenotypes and Evidence of a Digenic/Oligogenic Contribution to Disorders/Differences of Sex Development in a Large North African Cohort. *Front Genet* **2022,** 13, 900574.

27. Naamneh Elzenaty, R.; Martinez de Lapiscina, I.; Kouri, C.; Sauter, K. S.; Sommer, G.; Castano, L.; Fluck, C. E.; group, S. F. n. s., Characterization of 35 novel NR5A1/SF-1 variants identified in individuals with atypical sexual development: The SF1next study. *J Clin Endocrinol Metab* **2024**.
